# Supplementary material for: An ion-selective chemiresistive platform as demonstrated for the detection of nitrogen species in water
Source: Royal Society of Chemistry journal article supplement (doi:10.1039/d3an01267k), 2023-01-01
Supplement: d3an01267k1.pdf [file d3an01267k1.pdf]

## Supplementary Information

### An Ion-Selective Chemiresistive Platform as Demonstrated for the Detection of Nitrogen Species in Water

Maryam Darestani-Farahani<sup>a</sup>, Fanqing Ma<sup>a</sup>, Vinay Patel<sup>b</sup>, Ponnambalam Ravi  
Selvaganapathy<sup>b</sup>, Peter Kruse<sup>a,\*</sup>

<sup>a</sup>Department of Chemistry and Chemical Biology, McMaster University, 1280 Main Street West, Hamilton, Ontario L8S 4M1, Canada

<sup>b</sup>Department of Mechanical Engineering, McMaster University, 1280 Main Street West, Hamilton, Ontario L8S 4L7, Canada

\*Corresponding Author: [pkruise@mcmaster.ca](mailto:pkruise@mcmaster.ca)

(a)

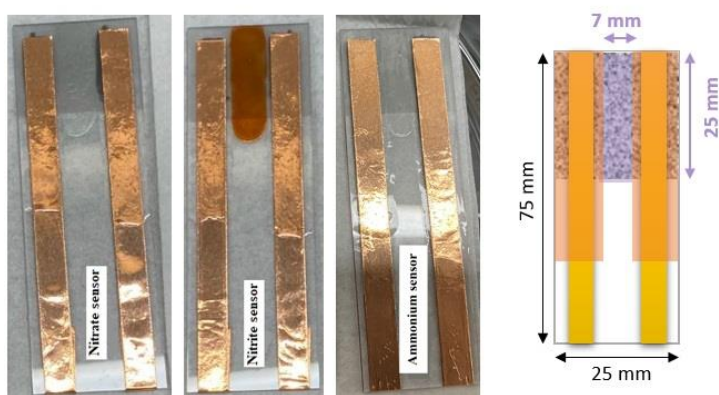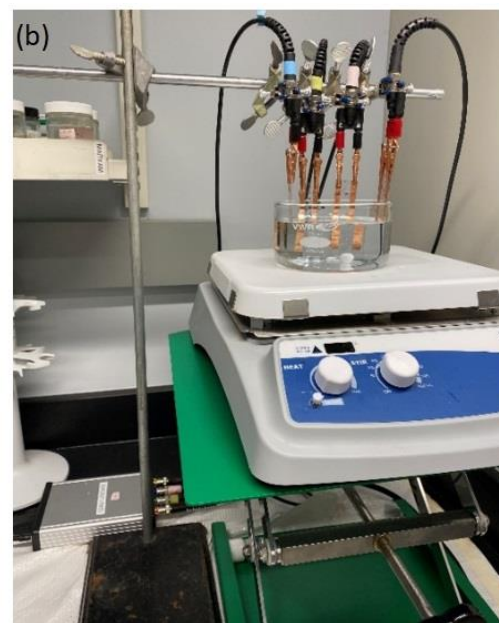

**Figure S1.** a) Images and dimensions of the fabricated sensors: nitrate sensor, nitrite sensor, ammonium sensor (from left to right). b) Experiment set-up: Installed sensors connected to an eDAQ device in a bowl of background solution which is constantly stirring on a stirrer and an adjustable support stand.

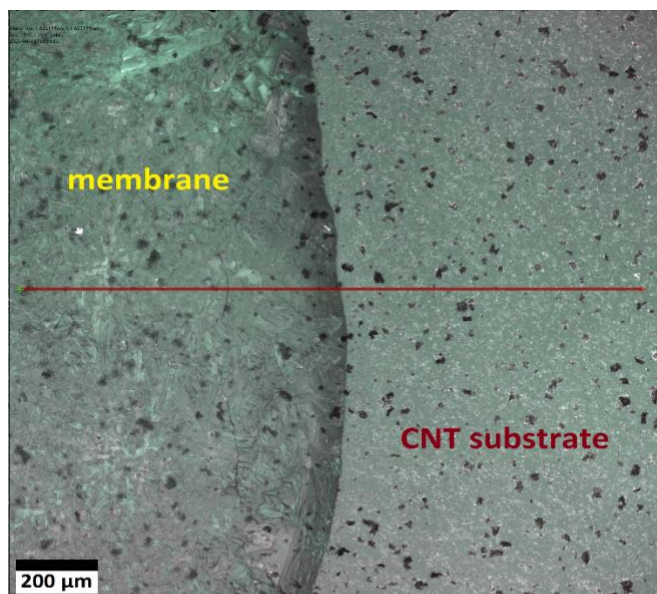

Height Step

|               | Angle / ° | Distance / μm |
|---------------|-----------|---------------|
| Height Step 1 | 0.049992  | 38.716314     |

**Figure S1.** Measured membrane thickness of the fabricated sensor by Alicona Microscopy, distance between CNT substrate and membrane (Scale bar: 200 μm).

**Table S1.** Resistance table of the fabricated sensors in this study

|                                | $R_{\text{cured CNT-TPM}}$<br>(kΩ) | $R_{\text{Cu contacts}}$ (kΩ) | $R_{\text{PDMS}}$ (kΩ) | $R_{\text{membrane}}$ (kΩ) | $R_{\text{conditioning}}$ (kΩ) |
|--------------------------------|------------------------------------|-------------------------------|------------------------|----------------------------|--------------------------------|
| <b>Nitrate sensor (range)</b>  | <b>12.0-19.0</b>                   | <b>12.0-19.0</b>              | <b>14.0-22.0</b>       | <b>19.0-28.0</b>           | <b>24.0-39.0</b>               |
| Sensor 1                       | 15.3                               | 14.5                          | 16.8                   | 22.5                       | 35.4                           |
| Sensor 2                       | 12.6                               | 12.1                          | 14.3                   | 19.4                       | 24.3                           |
| Sensor 3                       | 18.4                               | 18.1                          | 21.7                   | 27.6                       | 38.2                           |
| Sensor 4 (blank)               | 13.4                               | 13.2                          | 15.0                   | 21.6                       | 35.5                           |
| <b>Nitrite sensor (range)</b>  | <b>13.0-19.0</b>                   | <b>12.0-18.0</b>              | <b>14.0-22.0</b>       | <b>18.0-27.0</b>           | <b>25.0-43.0</b>               |
| Sensor 1                       | 13.4                               | 12.9                          | 14.4                   | 17.8                       | 25.0                           |
| Sensor 2                       | 18.2                               | 18.0                          | 21.3                   | 26.5                       | 42.2                           |
| Sensor 3                       | 15.5                               | 15.4                          | 18.2                   | 24.4                       | 38.7                           |
| Sensor 4 (blank)               | 17.1                               | 16.5                          | 18.7                   | 22.9                       | 36.2                           |
| <b>Ammonium sensor (range)</b> | <b>11.0-18.0</b>                   | <b>11.0-18.0</b>              | <b>13.0-20.0</b>       | <b>17.0-30.0</b>           | <b>27.0-47.0</b>               |
| Sensor 1                       | 11.2                               | 11.1                          | 13.2                   | 17.1                       | 27.0                           |
| Sensor 2                       | 14.2                               | 13.9                          | 14.5                   | 18.3                       | 28.8                           |
| Sensor 3                       | 17.5                               | 17.6                          | 19.3                   | 29.2                       | 46.3                           |

|                         |      |      |      |      |      |
|-------------------------|------|------|------|------|------|
| <b>Sensor 4 (blank)</b> | 16.6 | 16.3 | 17.9 | 24.5 | 38.2 |
|-------------------------|------|------|------|------|------|

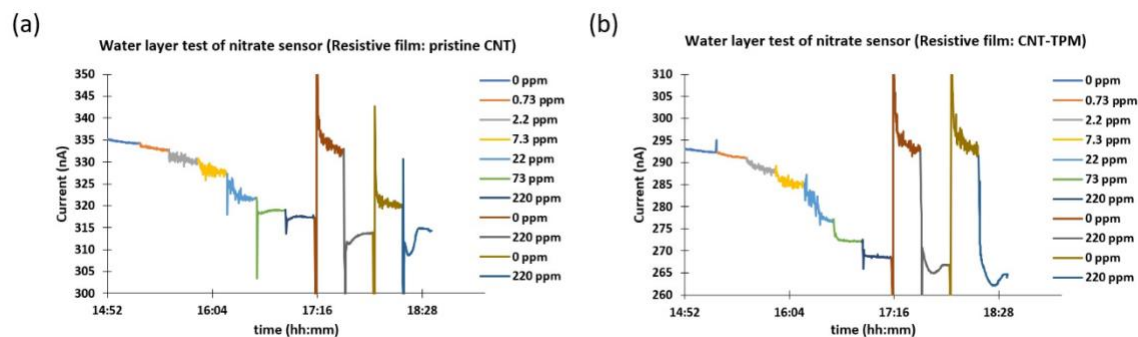

**Figure S3.** Water layer test. Sensor performance comparison between a) non-modified surface and b) optimized TPM modified surface.

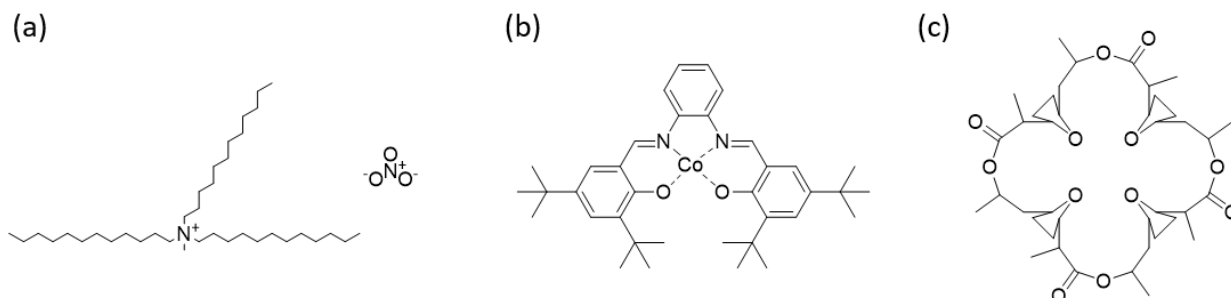

**Figure S4.** Ionophores structures. a) Nitrate ionophore: Tridodecylmethylammonium nitrate (TDMAN), b) Nitrite ionophore: Cobalt (II) tert-butyl salophen, c) Ammonium ionophore: Nonactin.

**Table S2.** Fitting parameters for calibration curves of each developed sensor.

| <i>Sensor</i> | <i>Fitted equation</i> | <i>A</i> | <i>B (ppm<sup>-1</sup>)</i> | <i>m (ppm<sup>-1</sup>)</i> | <i>n</i> | <i>R<sup>2</sup></i> |
|---------------|------------------------|----------|-----------------------------|-----------------------------|----------|----------------------|
| Nitrate       | Langmuir               | 14.1     | 0.06                        | -                           | -        | 0.99                 |
| Nitrite       | Langmuir               | 28.6     | 0.19                        | -                           | -        | 0.98                 |
| Ammonium      | Freundlich             | -        | -                           | 6.7                         | 4.5      | 0.95                 |

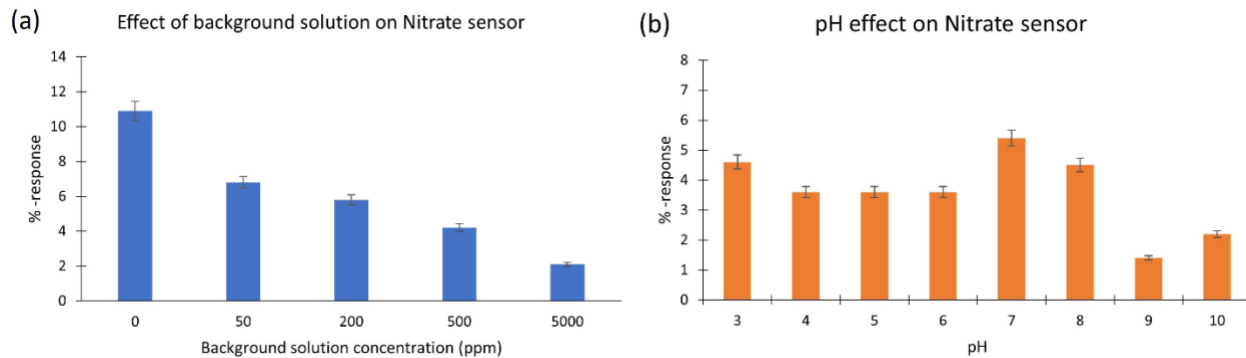

**Figure S5.** Effect of pH and background solution concentration on response of the nitrate sensor. 10 ppm of nitrate solution was added in all measurements, average response of three sensors.

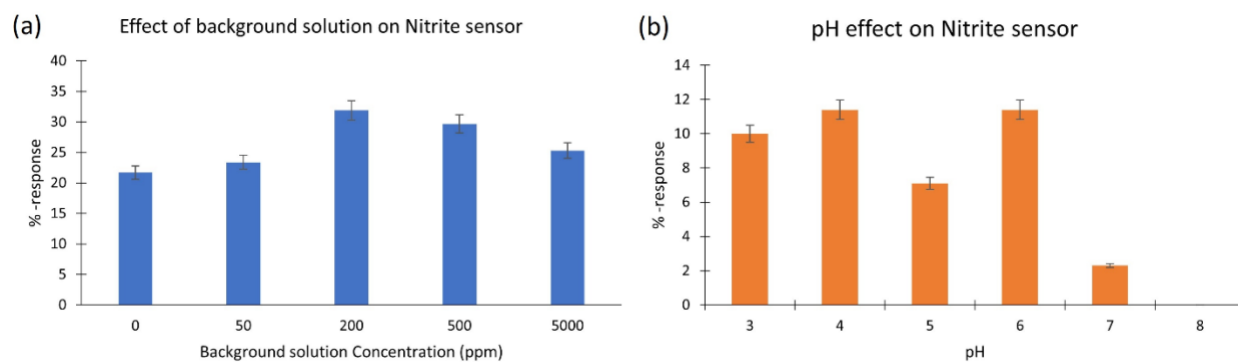

**Figure S6.** Effect of pH and background solution concentration on response of the nitrite sensor. 10 ppm of nitrite solution was added in all measurements, average response of three sensors.

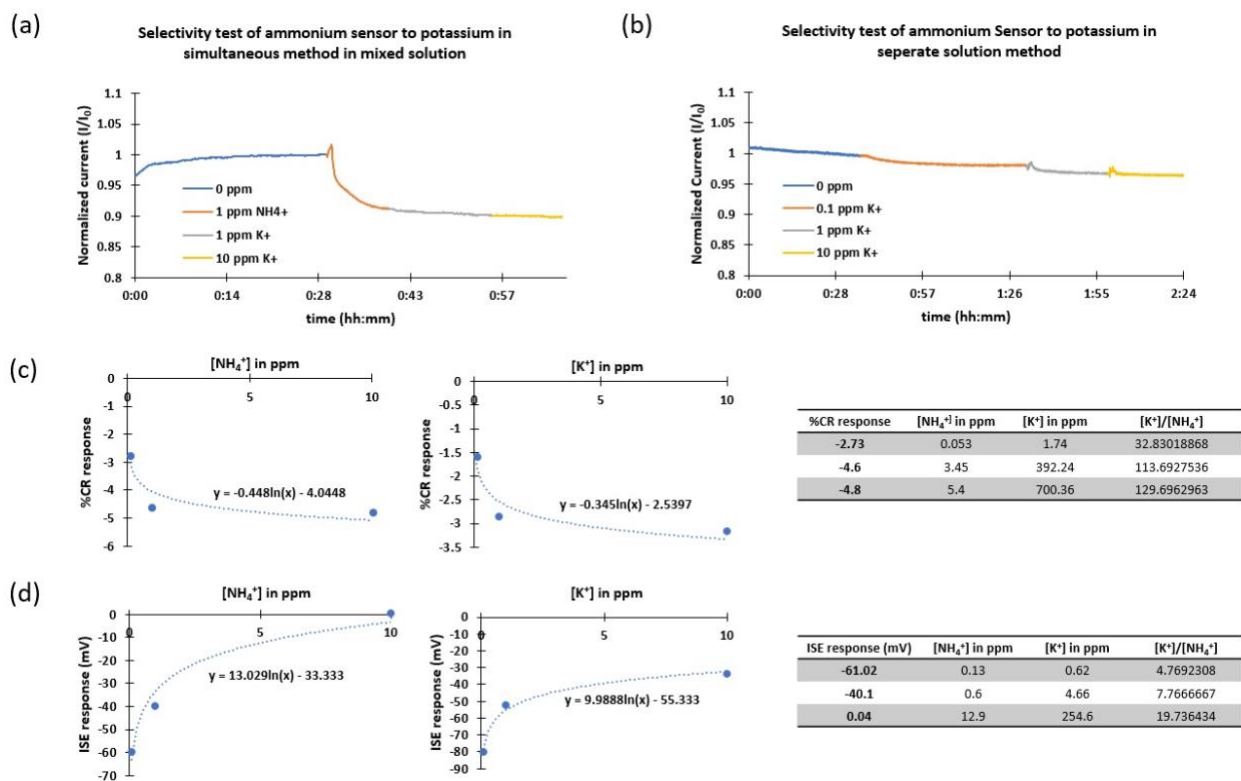

**Figure S7.** Investigation of potassium interference on the developed ammonium-selective chemiresistive sensor. a) potassium interference in presence of ammonium ions in solution, b) potassium interference in absence of ammonium in solution, c) Comparison of chemiresistive response of ammonium sensor to ammonium ions and potassium ions at different concentrations by plotting their calibration curves d) Comparison of potentiometric response of ammonium sensor to ammonium ions and potassium ions at different concentrations by plotting their calibration curves.

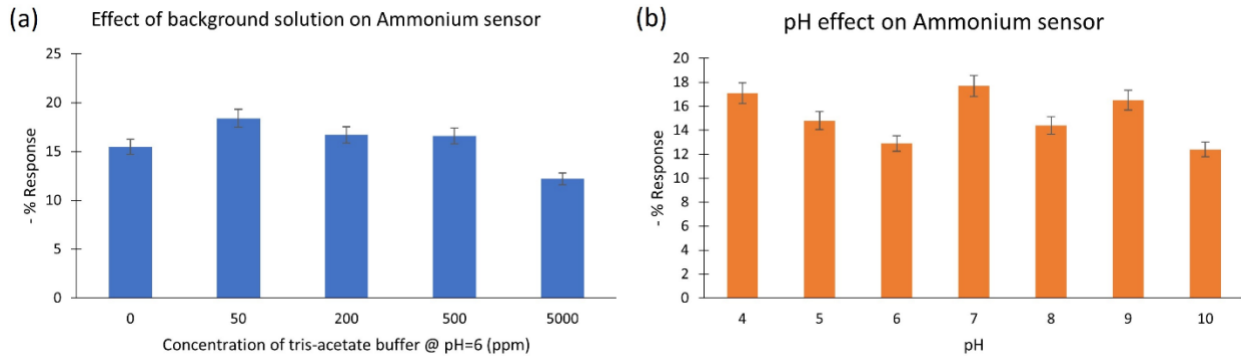

**Figure S8.** Effect of pH and background solution concentration on response of the ammonium sensor. 10 ppm of ammonium solution was added in all measurements, average response of three sensors.

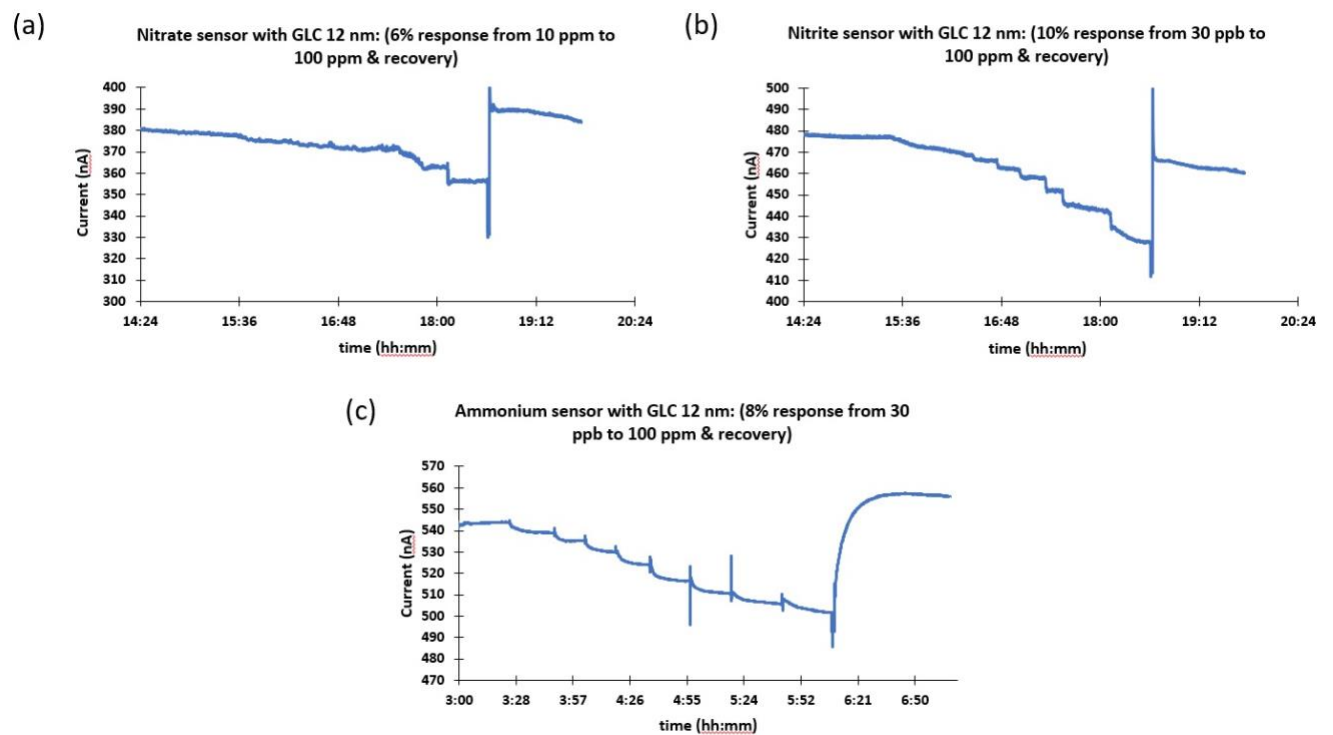

**Figure S9.** Responses of (a) nitrate, (b) nitrite and (c) ammonium sensors made of GLC sheets (thickness 12 nm). The sensors showed reversible responses with less sensitivity compared to CNT.

**Table S3.** Fabrication cost breakdown per sensor

| <b>Materials</b>                             | <b>Cost per sensor</b> |
|----------------------------------------------|------------------------|
| Glass slide                                  | 50¢                    |
| Pencil 9B                                    | <1¢                    |
| Carbon nanotube (CNT)                        | 10¢                    |
| 3-(Trimethoxysilyl)propyl methacrylate (TMP) | <1¢                    |
| Methanol                                     | <1¢                    |
| Copper tape                                  | 20¢                    |
| PDMS                                         | <1¢                    |
| Ionophore                                    | 30¢-40¢                |
| Plasticizer                                  | <1¢                    |
| PVC                                          | <1¢                    |
| THF                                          | <1¢                    |
| <b>Total</b>                                 | <b>&lt;\$1.3</b>       |

**Protocol for testing nitrate with Orion Aquamate 8000, UV-Vis spectrophotometer using the zinc reduction method**

The detection range of the protocol used was 1-40 mg/L nitrate ion. Therefore, the samples with nitrate values higher than the upper limit were diluted using DI water. The reagent vial was filled with the 10 ml of the sample and the blank was measured. Nitrate no. 1 tablet was added and crushed followed by nitrate no. 2 tablet. Once, both the tablets were dissolved, the sample was incubated for 10 minutes, and measurement was performed.

**Protocol for testing nitrite with Orion Aquamate 8000, UV-Vis spectrophotometer using the N-(1-Naphthyl)-ethylenediamine method**

The measuring range of the protocol used was 0.01-0.5 mg/L nitrogen concentration. Therefore, the samples with nitrogen values higher than the upper limit were diluted using DI water. The reagent vial was filled with the 10 ml of the sample and the blank was measured. Nitrite tablet was added and crushed. Once the tablet was dissolved, the sample was incubated for 10 minutes, and measurement was performed.

**Protocol for testing ammonium with Orion Aquamate 8000, UV-Vis spectrophotometer using the Indophenol Blue method**

The measuring range of the protocol used was 0.02-1 mg/L nitrogen concentration. Therefore, the samples with nitrogen values higher than the upper limit were diluted using DI water. The reagent vial was filled with 10 ml of sample, and the blank was measured. Ammonium no. 1 tablet was added and crushed followed by ammonium no. 2 tablet. Once both the tablets were dissolved, the sample was incubated for 10 minutes, and the measurement was performed.

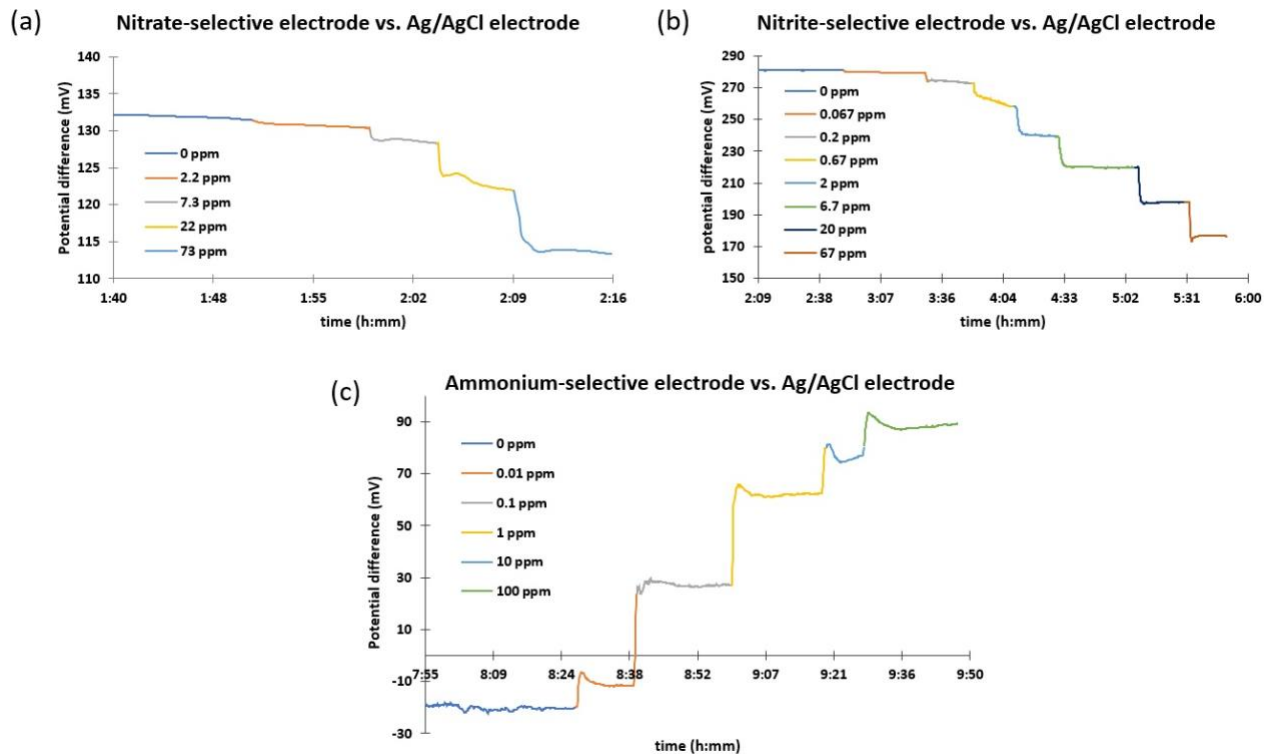

**Figure S10.** Potentiometric responses of (a) nitrate, (b) nitrite and (c) ammonium sensors when they used as ion-selective electrodes vs. a reference electrode.
